# Supplementary material for: Shifting gears: Diversification, intensification, and effort increases in small-scale fisheries (1950-2010)
Source: PLOS journal article supplement (doi:10.1371/journal.pone.0190232), 2018-03-14
Supplement: S2 (10.1371/journal.pone.0190232.s002) [file journal.pone.0190232.s002]

**S2 Table. Summary of GLS model statistics for changes in the total fishing effort (fishing days per year by fishers in participating villages) allocated to gears in the central Danajon Bank, Philippines (1960-2010).** Full models tested the effects of year and governance period, and their interaction on total fishing effort by each category of fishing gear. Models considered changes in the use of eight general classes of fishing gears and four pairs of intensive/non-intensive gear categories.

| Model                            | Variable                            | Coefficient<br>Effect | F-value | p-value |
|----------------------------------|-------------------------------------|-----------------------|---------|---------|
| <b>Four common fishing gears</b> |                                     |                       |         |         |
| <i>Net</i>                       |                                     |                       |         |         |
|                                  | Intercept                           | -                     | 5173.26 | < 0.001 |
|                                  | Year                                | +                     | 386.83  | < 0.001 |
| <i>Dive</i>                      |                                     |                       |         |         |
|                                  | Intercept                           | -                     | 38.54   | < 0.001 |
|                                  | Year                                | +                     | 47.45   | < 0.001 |
| <i>Hook</i>                      |                                     |                       |         |         |
|                                  | Intercept                           | -                     | 977.98  | < 0.001 |
|                                  | Year                                | +                     | 4.20    | 0.05    |
| <i>Trap</i>                      |                                     |                       |         |         |
|                                  | Intercept                           | +                     | 2520.37 | < 0.001 |
|                                  | Year                                | -                     | 1.77    | 0.19    |
|                                  | Governance era                      |                       | 9.18    | < 0.001 |
|                                  | Governance era (Productivity)       | +                     |         |         |
|                                  | Governance era (Decentralized)      | -                     |         |         |
|                                  | Governance era (Co-management)      | -                     |         |         |
|                                  | Year:Governance era                 |                       | 9.69    | < 0.001 |
|                                  | Year:Governance era (Productivity)  | -                     |         |         |
|                                  | Year:Governance era (Decentralized) | +                     |         |         |
|                                  | Year:Governance era (Co-management) | +                     |         |         |

| Model                              | Variable                            | Coefficient<br>Effect | F-value | p-value |
|------------------------------------|-------------------------------------|-----------------------|---------|---------|
| <b>Four uncommon fishing gears</b> |                                     |                       |         |         |
| <i>Blast</i>                       |                                     |                       |         |         |
|                                    | Intercept                           | +                     | 1060.69 | < 0.001 |
|                                    | Year                                | -                     | 0.18    | 0.67    |
|                                    | Governance era                      |                       | 5.68    | < 0.01  |
|                                    | Governance era (Productivity)       | -                     |         |         |
|                                    | Governance era (Decentralized)      | -                     |         |         |
|                                    | Governance era (Co-management)      | -                     |         |         |
|                                    | Year:Governance era                 |                       | 22.05   | < 0.001 |
|                                    | Year:Governance era (Productivity)  | +                     |         |         |
|                                    | Year:Governance era (Decentralized) | +                     |         |         |
|                                    | Year:Governance era (Co-management) | +                     |         |         |
| <i>Poison</i>                      |                                     |                       |         |         |
|                                    | Intercept                           | +                     | 481.49  | < 0.001 |
| <i>Gleaning</i>                    |                                     |                       |         |         |
|                                    | Intercept                           | -                     | 229.10  | < 0.001 |
|                                    | Year                                | +                     | 2.78    | 0.10    |
|                                    | Governance era                      |                       | 2.23    | 0.10    |
|                                    | Governance era (Productivity)       | +                     |         |         |
|                                    | Governance era (Decentralized)      | +                     |         |         |
|                                    | Governance era (Co-management)      | -                     |         |         |
|                                    | Year:Governance era                 |                       | 3.65    | 0.02    |
|                                    | Year:Governance era (Productivity)  | -                     |         |         |
|                                    | Year:Governance era (Decentralized) | -                     |         |         |
| <i>Corral</i>                      |                                     |                       |         |         |
|                                    | Intercept                           | -                     | 977.98  | < 0.001 |
|                                    | Year                                | +                     | 4.20    | 0.05    |
|                                    | Year:Governance era (Co-management) | +                     |         |         |

| Model                          | Variable                            | Coefficient<br>Effect | F-value | p-value |
|--------------------------------|-------------------------------------|-----------------------|---------|---------|
| <b>Intensive fishing gears</b> |                                     |                       |         |         |
| <i>Destructive</i>             |                                     |                       |         |         |
|                                | Intercept                           | -                     | 59.43   | < 0.001 |
|                                | Year                                | +                     | 13.63   | < 0.001 |
| <i>Active</i>                  |                                     |                       |         |         |
|                                | Intercept                           | -                     | 437.89  | < 0.001 |
|                                | Year                                | +                     | 79.33   | < 0.001 |
| <i>Non-selective</i>           |                                     |                       |         |         |
|                                | Intercept                           | -                     | 90.93   | < 0.001 |
|                                | Year                                | +                     | 52.75   | < 0.001 |
| <i>Illegal</i>                 |                                     |                       |         |         |
|                                | Intercept                           | +                     | 64.14   | < 0.001 |
|                                | Year                                | -                     | 44.15   | < 0.001 |
|                                | Governance era                      |                       | 28.32   | < 0.001 |
|                                | Governance era (Productivity)       | -                     |         |         |
|                                | Governance era (Decentralized)      | -                     |         |         |
|                                | Governance era (Co-management)      | -                     |         |         |
|                                | Year:Governance era                 |                       | 2.23    | 0.10    |
|                                | Year:Governance era (Productivity)  | +                     |         |         |
|                                | Year:Governance era (Decentralized) | +                     |         |         |
|                                | Year:Governance era (Co-management) | +                     |         |         |

| Model                              | Variable                            | Coefficient<br>Effect | F-value | p-value |
|------------------------------------|-------------------------------------|-----------------------|---------|---------|
| <b>Non-intensive fishing gears</b> |                                     |                       |         |         |
| <i>Non-destructive</i>             |                                     |                       |         |         |
|                                    | Intercept                           | -                     | 42.72   | < 0.001 |
|                                    | Year                                | +                     | 32.04   | < 0.001 |
| <i>Passive</i>                     |                                     |                       |         |         |
|                                    | Intercept                           | -                     | 144.39  | < 0.001 |
|                                    | Year                                | +                     | 9.70    | < 0.01  |
|                                    | Governance era                      |                       |         |         |
|                                    | Governance era (Productivity)       | +                     | 0.10    | 0.96    |
|                                    | Governance era (Decentralized)      | +                     | 2.50    | 0.07    |
|                                    | Governance era (Co-management)      | -                     |         |         |
|                                    | Year:Governance era                 |                       |         |         |
|                                    | Year:Governance era (Productivity)  | -                     |         |         |
|                                    | Year:Governance era (Decentralized) | -                     |         |         |
|                                    | Year:Governance era (Co-management) | -                     |         |         |
| <i>Selective</i>                   |                                     |                       |         |         |
|                                    | Intercept                           | -                     | 159.37  | < 0.001 |
|                                    | Year                                | +                     | 4.71    | 0.03    |
| <i>Legal</i>                       |                                     |                       |         |         |
|                                    | Intercept                           | -                     | 831.04  | < 0.001 |
|                                    | Year                                | +                     | 55.07   | < 0.001 |
|                                    | Governance era                      |                       | 19.25   | < 0.001 |
|                                    | Governance era (Productivity)       | +                     |         |         |
|                                    | Governance era (Decentralized)      | -                     |         |         |
|                                    | Governance era (Co-management)      | -                     |         |         |
|                                    | Year:Governance era                 |                       | 1.81    | 0.16    |
|                                    | Year:Governance era (Productivity)  | -                     |         |         |
|                                    | Year:Governance era (Decentralized) | +                     |         |         |
|                                    | Year:Governance era (Co-management) | +                     |         |         |
